# Supplementary material
Source: PubMed Central journal article supplement (PMC6867191)
Supplement: ehp-127-105001-s001.pdf [file ehp-127-105001-s001.pdf]

**Note to readers with disabilities:** *EHP* strives to ensure that all journal content is accessible to all readers. However, some figures and Supplemental Material published in *EHP* articles may not conform to [508 standards](#) due to the complexity of the information being presented. If you need assistance accessing journal content, please contact [ehp508@niehs.nih.gov](mailto:ehp508@niehs.nih.gov). Our staff will work with you to assess and meet your accessibility needs within 3 working days.

### **Supplemental Material**

#### **Improving and Expanding Estimates of the Global Burden of Disease Due to Environmental Health Risk Factors**

Rachel M. Shaffer, Samuel P. Sellers, Marissa G. Baker, Rebeca de Buen Kalman, Joseph Frostad, Megan K. Suter, Susan C. Anenberg, John Balbus, Niladri Basu, David C. Bellinger, Linda Birnbaum, Michael Brauer, Aaron Cohen, Kristie L. Ebi, Richard Fuller, Philippe Grandjean, Jeremy J. Hess, Manolis Kogevinas, Pushpam Kumar, Philip J. Landrigan, Bruce Lanphear, Stephanie J. London, Andrew A. Rooney, Jeffrey D. Stanaway, Leonardo Trasande, Katherine Walker, and Howard Hu

#### **Table of Contents**

**Appendix 1.** Summary of key GBD-PHI recommendations.

Appendix 1: Summary of key GBD-PHI recommendations.

| <u>For IHME/GBD</u>                                                                                                                                                                                                                                           | <u>For the EH Research Community</u>                                                                                                                               |
|---------------------------------------------------------------------------------------------------------------------------------------------------------------------------------------------------------------------------------------------------------------|--------------------------------------------------------------------------------------------------------------------------------------------------------------------|
| <b>Air Pollution</b>                                                                                                                                                                                                                                          |                                                                                                                                                                    |
| <ul style="list-style-type: none"> <li>• Advance methods to calculate joint burden</li> </ul>                                                                                                                                                                 | <ul style="list-style-type: none"> <li>• Advance methods to calculate joint burden</li> <li>• Publish additional studies in high and low exposure areas</li> </ul> |
| <ul style="list-style-type: none"> <li>• Source apportionment</li> </ul>                                                                                                                                                                                      | <ul style="list-style-type: none"> <li>• Advance research on differential toxicity</li> </ul>                                                                      |
| <b>Lead</b>                                                                                                                                                                                                                                                   |                                                                                                                                                                    |
| <ul style="list-style-type: none"> <li>• Utilize human capital method to account for full spectrum of lead effects</li> </ul>                                                                                                                                 | <ul style="list-style-type: none"> <li>• Obtain better data on B-Pb levels in LMICs</li> </ul>                                                                     |
| <ul style="list-style-type: none"> <li>• Account for direct effects of low-level lead exposure on CVD</li> </ul>                                                                                                                                              |                                                                                                                                                                    |
| <ul style="list-style-type: none"> <li>• Increase collaborations with subject-matter experts</li> </ul>                                                                                                                                                       |                                                                                                                                                                    |
| <b>Priority New Risk Factors</b>                                                                                                                                                                                                                              |                                                                                                                                                                    |
| <ul style="list-style-type: none"> <li>• Begin scoping for inclusion of other neurotoxicants (methylmercury, arsenic, polychlorinated biphenyls, polybrominated diethyl esters (PBDEs), organophosphate pesticides, and particulate air pollution)</li> </ul> | <ul style="list-style-type: none"> <li>• Publish comprehensive population exposure estimates to facilitate inclusion of new risk factors in GBD</li> </ul>         |
| <ul style="list-style-type: none"> <li>• Begin scoping for inclusion of endocrine-disrupting chemicals</li> <li>• Increase collaborations with subject-matter experts</li> </ul>                                                                              |                                                                                                                                                                    |
| <b>Climate</b>                                                                                                                                                                                                                                                |                                                                                                                                                                    |
| <ul style="list-style-type: none"> <li>• Address changes in temperature/precipitation patterns</li> </ul>                                                                                                                                                     | <ul style="list-style-type: none"> <li>• Advance research on climate change and mental health outcomes in LMICs</li> </ul>                                         |
| <ul style="list-style-type: none"> <li>• Address changes in ranges of infectious disease vectors</li> </ul>                                                                                                                                                   | <ul style="list-style-type: none"> <li>• Develop stronger understanding of the relationship between climate change, migration, conflict, and health</li> </ul>     |
| <ul style="list-style-type: none"> <li>• Incorporate projections of changing ranges of infectious disease vectors</li> </ul>                                                                                                                                  |                                                                                                                                                                    |
| <ul style="list-style-type: none"> <li>• Calculate climate change effects of air pollution</li> </ul>                                                                                                                                                         |                                                                                                                                                                    |
| <b>Nomination &amp; Ranking</b>                                                                                                                                                                                                                               |                                                                                                                                                                    |
| <ul style="list-style-type: none"> <li>• Create EH Risk Factors Working Group</li> </ul>                                                                                                                                                                      | <ul style="list-style-type: none"> <li>• Publish systematic reviews to facilitate incorporation of new EH risk-outcome pairs in the GBD</li> </ul>                 |
| <ul style="list-style-type: none"> <li>• Utilize existing hazard and risk classifications by authoritative bodies</li> </ul>                                                                                                                                  |                                                                                                                                                                    |
| <ul style="list-style-type: none"> <li>• Advance EH systematic review methods through collaboration with NIEHS/NTP</li> </ul>                                                                                                                                 |                                                                                                                                                                    |
| <ul style="list-style-type: none"> <li>• Prioritize new EH risk factors based on strength of evidence, size of exposed populations, trends in exposures and diseases, and feasibility/availability of exposure assessment</li> </ul>                          |                                                                                                                                                                    |
| <ul style="list-style-type: none"> <li>• Give appropriate weight to EH observational studies</li> </ul>                                                                                                                                                       |                                                                                                                                                                    |
| <ul style="list-style-type: none"> <li>• Consider conflict of interest in assessment of study quality</li> </ul>                                                                                                                                              |                                                                                                                                                                    |
