# Supplementary material
Source: PubMed Central journal article supplement (PMC6867191)
Supplement: ehp-127-105001-s002.pdf [file ehp-127-105001-s002.pdf]

**Note to readers with disabilities:** *EHP* strives to ensure that all journal content is accessible to all readers. However, some figures and Supplemental Material published in *EHP* articles may not conform to [508 standards](#) due to the complexity of the information being presented. If you need assistance accessing journal content, please contact [ehp508@niehs.nih.gov](mailto:ehp508@niehs.nih.gov). Our staff will work with you to assess and meet your accessibility needs within 3 working days.

### **Supplemental Material**

#### **Improving and Expanding Estimates of the Global Burden of Disease Due to Environmental Health Risk Factors**

Rachel M. Shaffer, Samuel P. Sellers, Marissa G. Baker, Rebeca de Buen Kalman, Joseph Frostad, Megan K. Suter, Susan C. Anenberg, John Balbus, Niladri Basu, David C. Bellinger, Linda Birnbaum, Michael Brauer, Aaron Cohen, Kristie L. Ebi, Richard Fuller, Philippe Grandjean, Jeremy J. Hess, Manolis Kogevinas, Pushpam Kumar, Philip J. Landrigan, Bruce Lanphear, Stephanie J. London, Andrew A. Rooney, Jeffrey D. Stanaway, Leonardo Trasande, Katherine Walker, and Howard Hu

#### **Table of Contents**

**Appendix 1.** Summary of key GBD-PHI recommendations.
